# Supplementary material for: Can mesh nebulizers improve prehospital aerosol therapy? An in vitro study on simulated prehospital emergency patients suffering from respiratory distress
Source: Anaesthesiologie. 2022 Aug 17;71(10):758–66. [Article in German] doi: 10.1007/s00101-022-01183-y (PMC9525251; doi:10.1007/s00101-022-01183-y)
Supplement: Supplementary file 1 [file 101_2022_1183_MOESM1_ESM.pdf]

**Zusatzmaterial zum Beitrag** „Können Mesh-Vernebler die prähospitaler Aerosoltherapie verbessern? Eine in vitro Studie an simulierten Notfallpatient\*innen mit Atemnot“ von Otto M, Kropp Y, Kummer L et al. (2022) in *Die Anaesthesiologie*

Beitrag und Zusatzmaterial stehen Ihnen auf [www.springermedizin.de](http://www.springermedizin.de) zur Verfügung. Bitte geben Sie dort den Beitragstitel in die Suche ein.

## Tabellen des Elektronischen Zusatzmaterials

| <b>Tab. A</b>                                                                                                                                                                             |                                          |                                      |                              |
|-------------------------------------------------------------------------------------------------------------------------------------------------------------------------------------------|------------------------------------------|--------------------------------------|------------------------------|
| <b>Verneblerleistung (Aerosolausstoß in 10 Minuten) der drei getesteten Vernebler nach einer Verneblungszeit von 10 Minuten bei zwei bzw. drei unterschiedlichen Sauerstoffflussraten</b> |                                          |                                      |                              |
| <b>Vernebler</b>                                                                                                                                                                          |                                          | <b>Verneblerleistung (ml/10 min)</b> |                              |
|                                                                                                                                                                                           |                                          | <b>1 l O<sub>2</sub>/min</b>         | <b>6 l O<sub>2</sub>/min</b> |
| <b>Jet</b>                                                                                                                                                                                | Cirrus 2 (a)<br>(n = 40)                 | n/a                                  | <b>1.05 ± 0.06</b>           |
|                                                                                                                                                                                           |                                          |                                      | < .001 <sup>b</sup>          |
|                                                                                                                                                                                           |                                          |                                      | < .001 <sup>c</sup>          |
|                                                                                                                                                                                           |                                          |                                      | < .001 <sup>d</sup>          |
| <b>Mesh</b>                                                                                                                                                                               | Aerogen Solo ohne Spacer (b)<br>(n = 60) | <b>3.60 ± 0.26</b>                   | <b>3.99 ± 0.3</b>            |
|                                                                                                                                                                                           |                                          | < .001 <sup>c</sup>                  | < .001 <sup>a</sup>          |
|                                                                                                                                                                                           |                                          | < .001 <sup>d</sup>                  | > .99 <sup>c</sup>           |
|                                                                                                                                                                                           |                                          | < .001 <sup>d</sup>                  | < .001 <sup>d</sup>          |
|                                                                                                                                                                                           | Aerogen Solo mit Spacer (c)<br>(n = 60)  | <b>3.83 ± 0.24</b>                   | <b>4.00 ± 0.34</b>           |
|                                                                                                                                                                                           |                                          | < .001 <sup>b</sup>                  | < .001 <sup>a</sup>          |
|                                                                                                                                                                                           |                                          | < .001 <sup>d</sup>                  | > .99 <sup>b</sup>           |
|                                                                                                                                                                                           |                                          | < .001 <sup>d</sup>                  | < .001 <sup>d</sup>          |
|                                                                                                                                                                                           | M-Neb mobile (d)<br>(n = 60)             | <b>4.7 ± 0.75</b>                    | <b>5.23 ± 0.64</b>           |
|                                                                                                                                                                                           |                                          | < .001 <sup>b</sup>                  | < .001 <sup>a</sup>          |
|                                                                                                                                                                                           |                                          | .002 <sup>c</sup>                    | < .001 <sup>b</sup>          |
|                                                                                                                                                                                           |                                          | < .001 <sup>c</sup>                  | < .001 <sup>c</sup>          |

<sup>a</sup> P verglichen mit der Leistung des (a) Cirrus 2 bei gleichem Sauerstofffluss

<sup>b</sup> P verglichen mit der Leistung des (b) Aerogen Solo (ohne Spacer) bei gleichem Sauerstofffluss

<sup>c</sup> P verglichen mit der Leistung des (c) Aerogen Solo (mit Spacer) bei gleichem Sauerstofffluss

<sup>d</sup> P verglichen mit der Leistung des (d) M-Neb mobile bei gleichem Sauerstofffluss

**Tab. B**
**Salbutamoldeposition der drei getesteten Vernebler nach einer Verneblungszeit von 10 Minuten bei zwei bzw. drei unterschiedlichen Sauerstoffflussraten**

| Vernebler |                                          | Salbutamoldeposition (mg) |                         |                          |
|-----------|------------------------------------------|---------------------------|-------------------------|--------------------------|
|           |                                          | 1 l O <sub>2</sub> /min   | 6 l O <sub>2</sub> /min | 12 l O <sub>2</sub> /min |
| Jet       | Cirrus 2 (a)<br>(n = 40)                 | n/a                       | <b>0.36 ± 0.09</b>      | <b>1.22 ± 0.34</b>       |
|           |                                          |                           | < .001 <sup>b</sup>     | < .001 <sup>b</sup>      |
|           |                                          |                           | < .001 <sup>c</sup>     | < .001 <sup>c</sup>      |
|           |                                          |                           | < .001 <sup>d</sup>     | < .001 <sup>d</sup>      |
| Mesh      | Aerogen Solo ohne Spacer (b)<br>(n = 60) | <b>1.82 ± 0.41</b>        | <b>2.82 ± 1.0</b>       | <b>2.50 ± 0.17</b>       |
|           |                                          | < .001 <sup>c</sup>       | < .001 <sup>a</sup>     | < .001 <sup>a</sup>      |
|           |                                          | 0.025 <sup>d</sup>        | > .99 <sup>c</sup>      | > .99 <sup>c</sup>       |
|           | Aerogen Solo mit Spacer (c)<br>(n = 60)  | <b>1.76 ± 0.65</b>        | <b>2.80 ± 0.78</b>      | <b>2.55 ± 0.9</b>        |
|           |                                          | .19 <sup>b</sup>          | < .001 <sup>a</sup>     | < 0.001 <sup>a</sup>     |
|           |                                          | .002 <sup>d</sup>         | > .99 <sup>b</sup>      | > .99 <sup>b</sup>       |
|           | M-Neb mobile (d)<br>(n = 60)             | <b>2.47 ± 0.68</b>        | <b>3.36 ± 0.64</b>      | <b>3.21 ± 0.97</b>       |
|           |                                          | .025 <sup>b</sup>         | < 0.001 <sup>a</sup>    | < .001 <sup>a</sup>      |
|           |                                          | .046 <sup>c</sup>         | .66 <sup>b</sup>        | .28 <sup>b</sup>         |
|           |                                          |                           | .40 <sup>c</sup>        | .51 <sup>c</sup>         |

<sup>a</sup> P verglichen mit der Deposition des (a) Cirrus 2 bei gleichem Sauerstofffluss

<sup>b</sup> P verglichen mit der Deposition des (b) Aerogen Solo (ohne Spacer) bei gleichem Sauerstofffluss

<sup>c</sup> P verglichen mit der Deposition des (c) Aerogen Solo (mit Spacer) bei gleichem Sauerstofffluss

<sup>d</sup> P verglichen mit der Deposition des (d) M-Neb mobile bei gleichem Sauerstofffluss
